# Supplementary material for: Loss of the BH3-only protein Bmf impairs B cell homeostasis and accelerates γ irradiation–induced thymic lymphoma development
Source: PubMed Central journal article supplement — J Exp Med. 2008 Mar 17;205(3):641–55. doi: 10.1084/jem.20071658 (PMC2275386; doi:10.1084/jem.20071658), 2008-03-17
Supplement: jexpmed_jem.20071658_7.pdf [file jexpmed_jem.20071658_7.pdf]

Table S1. Analysis of aged animals

| Cell populations                      | WT           | <i>bmf</i> <sup>-/-</sup> | <i>puma</i> <sup>-/-</sup> |
|---------------------------------------|--------------|---------------------------|----------------------------|
| Spleen                                |              |                           |                            |
| Total splenocytes (x10 <sup>7</sup> ) | 13.63 ± 0.57 | 21.5 ± 1.76 <sup>a</sup>  | 15.39 ± 1.13               |
| CD4 <sup>+</sup> T cells              | 2.24 ± 0.23  | 2.73 ± 0.23               | 2.77 ± 0.4                 |
| CD8 <sup>+</sup> T cells              | 1.24 ± 0.11  | 1.92 ± 0.15 <sup>a</sup>  | 1.93 ± 0.16 <sup>a</sup>   |
| B220 <sup>+</sup> B cells             | 8.5 ± 0.33   | 14.66 ± 1.33 <sup>a</sup> | 9.03 ± 0.59                |
| Bone marrow                           |              |                           |                            |
| Total cellularity (x10 <sup>6</sup> ) | 42.73 ± 2.39 | 41.51 ± 3.29              | 39.95 ± 4.66               |
| Monocytes                             | 6.3 ± 0.53   | 6.11 ± 0.56               | 5.85 ± 0.49                |
| Granulocytes                          | 13.8 ± 1.29  | 13.76 ± 1.13              | 14.81 ± 1.13               |
| B cells                               | 7.72 ± 0.9   | 10.53 ± 0.92 <sup>a</sup> | 6.88 ± 1.15                |

Quantitative analysis of total cellularity and cellularity of leukocyte subsets in the spleen and bone marrow (both femora) of aged mice, as determined by cell counting and flow cytometric analysis after staining with cell surface marker-specific antibodies. Total numbers of CD4<sup>+</sup> T cells, CD8<sup>+</sup> T cells, B220<sup>+</sup> B cells, monocytes (Mac1<sup>+</sup>Gr1<sup>-</sup>), and granulocytes (Mac1<sup>+</sup>Gr1<sup>+</sup>) in mice of the indicated genotypes are shown. Numbers represent the means (± the SEM) of 8–15 mice per genotype.

<sup>a</sup>P < 0.05 as compared to WT mice.
